1 **Clinical performance of SARS-CoV-2 IgG antibody tests and potential protective immunity**

2

3 Niko Kohmer<sup>1</sup>, Sandra Westhaus<sup>1</sup>, Cornelia Rühl<sup>1</sup>, Sandra Ciesek<sup>1,2</sup> Holger F. Rabenau<sup>1</sup>

4

5 <sup>1</sup>Institute for Medical Virology, University Hospital, Goethe University Frankfurt am Main, Frankfurt,  
6 Germany

7 <sup>2</sup> German Centre for Infection Research, External partner site Frankfurt, Germany

8

9

10

11

12

13

14 Corresponding author:

15 Prof. Dr. Sandra Ciesek, MD

16 Institute for Medical Virology

17 University Hospital, Goethe University Frankfurt

18 Paul-Ehrlich-Str. 40

19 60590 Frankfurt am Main

20 Germany

21 Email: Sandra.ciesek@kgu.de

22 Phone: +4969 6301-5219

23

24 **Abstract**

25 As the current SARS-CoV-2 pandemic continues, serological assays are urgently needed for rapid  
26 diagnosis, contact tracing and for epidemiological studies. So far, there is little data on how  
27 commercially available tests perform with real patient samples and if detected IgG antibodies  
28 provide protective immunity. Focusing on IgG antibodies, we demonstrate the performance of two  
29 ELISA assays (Euroimmun SARS-CoV-2 IgG & Vircell COVID-19 ELISA IgG) in comparison to one lateral  
30 flow assay ((LFA) FaStep COVID-19 IgG/IgM Rapid Test Device) and two in-house developed assays  
31 (immunofluorescence assay (IFA) and plaque reduction neutralization test (PRNT)). We tested follow  
32 up serum/plasma samples of individuals PCR-diagnosed with COVID-19. Most of the SARS-CoV-2  
33 samples were from individuals with moderate to severe clinical course, who required an in-patient  
34 hospital stay.

35 For all examined assays, the sensitivity ranged from 58.8 to 76.5% for the early phase of infection  
36 (days 5-9) and from 93.8 to 100% for the later period (days 10-18) after PCR-diagnosed with COVID-  
37 19. With exception of one sample, all positive tested samples in the analysed cohort, using the  
38 commercially available assays examined (including the in-house developed IFA), demonstrated  
39 neutralizing (protective) properties in the PRNT, indicating a potential protective immunity to SARS-  
40 CoV-2. Regarding specificity, there was evidence that samples of endemic coronavirus (HCoV-OC43,  
41 HCoV-229E) and Epstein Barr virus (EBV) infected individuals cross-reacted in the ELISA assays and  
42 IFA, in one case generating a false positive result (may giving a false sense of security). This need to  
43 be further investigated.

44

## 45 **Background**

46 SARS-CoV-2 is a new Coronavirus, belonging to the group of betacoronaviruses, which emerged in  
47 December 2019 in Wuhan, China. It is the causative agent of an acute respiratory disease known as  
48 coronavirus disease 2019 (COVID-19). The spectrum of clinical signs can be very broad and  
49 asymptomatic infections are reported. The virus has rapidly spread globally. On 11 March 2020 the  
50 World Health Organization (WHO) declared COVID-19 as a pandemic. Nucleic acid amplification  
51 testing (NAT) is the method of choice in the early phase of infection (1). However, to acquire  
52 knowledge about the seroprevalence of SARS-CoV-2 and to test for (potential) individual immunity,  
53 there is an increasing demand in the detection of antibodies – especially of IgG antibodies.  
54 Convalescent plasma may be used for therapeutic or prophylactic approaches as vaccines and other  
55 drugs are under development (2). For all these purposes, sensitive and especially highly specific  
56 antibody assays are needed. The spike (S) protein of SARS-CoV-2 has shown to be highly  
57 immunogenic and is the main target for neutralizing antibodies (3). Currently there are many S  
58 protein based commercially or in-house developed assays available, but there is limited data on how  
59 these tests perform with clinical samples and if the detected IgG antibodies provide protective  
60 immunity. This study aims to provide a quick overview on some of these assays (two commercial  
61 available ELISA, an LFA, an IFA and a PRNT, focusing on the detection and neutralization capacity of  
62 IgG antibodies in follow up serum or plasma samples of individuals with PCR-diagnosed infections  
63 with SARS-CoV-2. To assess potential cross-reactivity, we examined defined follow-up samples of  
64 individuals infected with endemic coronaviruses and other infectious diseases.

65

## 66 **Materials and methods**

### 67 **Serum and plasma samples**

68 We collected follow up serum or plasma samples (in the following simply stated as samples) from  
69 individuals with PCR-diagnosed infections with SARS-CoV-2 (n=33) at different time points (table 1).  
70 Most of these individuals had a moderate to severe clinical course and required an in-patient hospital  
71 stay at the intensive care unit. Additionally, follow up samples of recent PCR-diagnosed infections  
72 with SARS-CoV (3 patients from the 2003 outbreak), HCoV-OC43 (n=4), HCoV-HKU1 (n=1), HCoV-  
73 NL63 (n=2), HCoV-229E (n=4) and recent serological/PCR-diagnosed infections with acute EBV (n=4,  
74 three serologically EBV-VCA-IgM positive and one PCR- and serologically EBV-VCA-IgM positive) and  
75 acute CMV (n=3) (all serologically IgM and PCR-positive) were collected. The samples of individuals  
76 infected with endemic human coronavirus, CMV and EBV were used to assess potential cross  
77 reactivity and the risk of potential false positive results.

### 78 **Lateral flow assay**

79 The FasStep (COVID-19 IgG/IgM) rapid test cassettes (COV-W32M, Assure Tech (Hangzhou) Co., Ltd,  
80 China) were used according to the manufacturer's recommendation. We have no details on the used  
81 antigen component. 10 µl serum and two drops of sample buffer were applied to the sample well.  
82 Test results were visually evaluated after 10 minutes.

### 83 **ELISA**

84 The CE certified versions of the Euroimmun SARS-CoV-2 IgG ELISA (Euroimmun, Lübeck, Germany)  
85 and Vircell COVID-19 ELISA IgG (Vircell Spain S.L.U., Granada, Spain) were used, in an identical  
86 manner, according to the manufacturer's recommendation. Both ELISAS use SARS-CoV-2  
87 recombinant antigen from spike glycoprotein (S protein) and the Vircell ELISA additionally  
88 Nucleocapsid (N protein). Samples were diluted 1:101 or 1:20, respectively, in sample buffer and  
89 incubated at 37° for 60 min in a 96-well microtiter plate followed by each protocols washing and  
90 incubation cycles, including controls and required reagents. Optical density (OD) was measured for

91 both assays at 450 nm using a Virclia microplate reader (Vircell Spain S.L.U., Granada, Spain). The  
92 signal-to-cut-off ratio was calculated and values expressed according to each manufacturer's  
93 protocol.

#### 94 **Immunofluorescence assay (IFA)**

95 For an immunofluorescence assay Vero cells (african green monkey, ATCC CCL-81 (American Type  
96 Culture Collection, Manassas, Virginia, USA)) were infected with SARS-CoV-2 and harvested two days  
97 post infection. Briefly, cells were trypsinized and washed once with PBS before transferred onto a 10-  
98 well diagnostic microscope slides. After drying, cells were fixated with 100% ethanol for 10 minutes.  
99 Patient samples were diluted in sample buffer (Euroimmun AG, Lübeck, Germany) in a dilution of  
100 1:50 and 30 µl applied per well. The slides were incubated at 37°C for 1 hour and washed three times  
101 with phosphate-buffered saline (PBS)-Tween (0.1%) for 5 minutes. 25 µl of goat-anti human  
102 fluorescein-labeled IgG conjugate was used as secondary antibody. The slides then were incubated  
103 for 30 minutes and washed three times with PBS-Tween for 5 minutes. The microscopic analysis was  
104 performed by 200-fold magnification using a Leica DMLS fluorescence microscope (Leica  
105 Mikrosysteme Vertrieb GmbH, Wetzlar Germany).

106

#### 107 **Plaque reduction neutralization test (PRNT)**

108 To test for neutralizing capacity of SARS-CoV-2 specific antibodies, Caco-2 cells (human colon  
109 carcinoma cells, ATCC DSMZ ACC-169 (American Type Culture Collection, Manassas, Virginia, USA))  
110 were seeded on a 96-well plate 3-5 days prior infection. 2-fold dilutions of the test sera beginning  
111 with a 1:10 dilution (1:10; 1:20; 1:40; 1:80; 1:160; 1:320; 1:640 and 1:1280) were made in culture  
112 medium (Minimum essential medium, MEM; Gibco, Dublin, Ireland) before mixed 1:1 with 100  
113 TCID50 (Tissue culture infectious dosis 50) of reference virus (SARS-CoV-2 FFM1 isolate). FFM1 was  
114 isolated from a patient at University Hospital Frankfurt who was tested positive for SARS-CoV-2 by  
115 PCR. Virus-serum mixture was incubated for one hour at 37°C and transferred onto the cell

116 monolayer. Virus related cytopathic effects (CPE) were determined microscopically 48 to 72 hours  
117 post infection. To determine a potential neutralizing ability of patient serum, CPE at a sample dilution  
118 of 1:10 is defined as non-protective while a CPE at a dilution of >1:20, is defined as protective.

119 **Results**

120 In the early phase of infection, from days 5-9 after PCR-confirmed infection with SARS-CoV-2, the in-  
 121 house developed IFA and PRNT showed a sensitivity of 76.5% (13/17), the Vircell ELISA a sensitivity of  
 122 70.6% (12/17), the Assure Tech Rapid Test a sensitivity of 62.5% (10/16) and the Euroimmun ELISA a  
 123 sensitivity of 58.8% (10/17). For the later period from days 10-18, the Euroimmun ELISA and Assure  
 124 Tech Rapid Test showed a sensitivity 93.8% (15/16), the Vircell ELISA, IFA and PRNT of 100% (16/16) -  
 125 (TABLE 1). For selected samples (SARS-CoV samples from the 2003 outbreak excluded, TABLE S2), the  
 126 Euroimmun ELISA showed a specificity of 95.7%, generating a borderline result for the HCoV-OC43  
 127 sample, the Vircell ELISA of 95.2%, generating a positive result for HCoV-229E sample and the in-  
 128 house developed IFA of 100% (an unspecific result for one EBV sample was excluded). Including the  
 129 three SARS-CoV samples from the 2003 outbreak, the Euroimmun ELISA showed a specificity of  
 130 96.2% (not generating any cross-reactive results for the SARS-CoV samples), the IFA of 86.4% and the  
 131 Vircell ELISA of 83.3% (both assays generating positive results for all three SARS-CoV samples). The  
 132 Assure Tech Rapid Test did not generate any false positive results for the tested samples. None of the  
 133 other tested samples cross-reacted in terms of generating borderline or false positive results.

134 TABLE 1 – Sensitivity and specificity of the examined SARS-CoV-2 IgG assays from days 5-9 and days 10-18.

| Company                  | Days after confirmed SARS-CoV-2 PCR |                 |                 |                                        |
|--------------------------|-------------------------------------|-----------------|-----------------|----------------------------------------|
|                          | 5-9 (days)                          | 10-18 (days)    |                 |                                        |
|                          |                                     | sensitivity (%) | specificity (%) | specificity (%) incl. SARS-CoV (2003)* |
| Euroimmun (ELISA)        | 58.8 (10/17)                        | 93.8 (15/16)    | 95.7 (22**/23)  | 96.2 (25/26)                           |
| Vircell (ELISA)          | 70.6 (12/17)                        | 100 (16/16)     | 95.2 (20/21)    | 83.3 (20/24)                           |
| IFA (in-house)           | 76.5 (13/17)                        | 100 (16/16)     | 100 (19/19)***  | 86.4 (19/22)                           |
| Assure Tech (Rapid test) | 62.5 (10/16)                        | 93.8 (15/16)    | 100 (13/13)     | -                                      |
| PRNT (in-house)          | 76.5 (13/17)                        | 100 (16/16)     | -               | -                                      |

135 Details on tested samples see TABLE S1 and S2; \*including follow up samples of SARS-CoV (2003 outbreak), which is closely  
 136 related to SARS-CoV-2; \*\*one “borderline” result; \*\*\* one unspecific result was excluded-, not examined.

137

138 The signal-to-cut-off (S/CO) ratios of the Euroimmun and Vircell ELISA and the corresponding PRNT  
139 titers for the tested samples are shown in FIG 1. In samples 3, 10 and 11, none of the examined  
140 assays (including the IFA and Assure Tech Rapid Test), detected SARS-CoV-2 antibodies. In sample 1,  
141 only the Vircell ELISA, in sample 4 and 19 only the Vircell ELISA and PRNT (including the IFA) detected  
142 antibodies. In samples 12 and 16, only the PRNT (and IFA) detected antibodies (in sample 16 with a  
143 titer <1:10). With exception of sample 1, all with the ELISA positive tested samples were also positive  
144 tested with the IFA. In the detection of antibodies, the IFA performed like the PRNT on all examined  
145 samples. All with the commercially available assays positive tested samples (except of sample 1)  
146 showed neutralizing properties in the PRNT (titer >1:20), indicating a potential protective immunity.

147



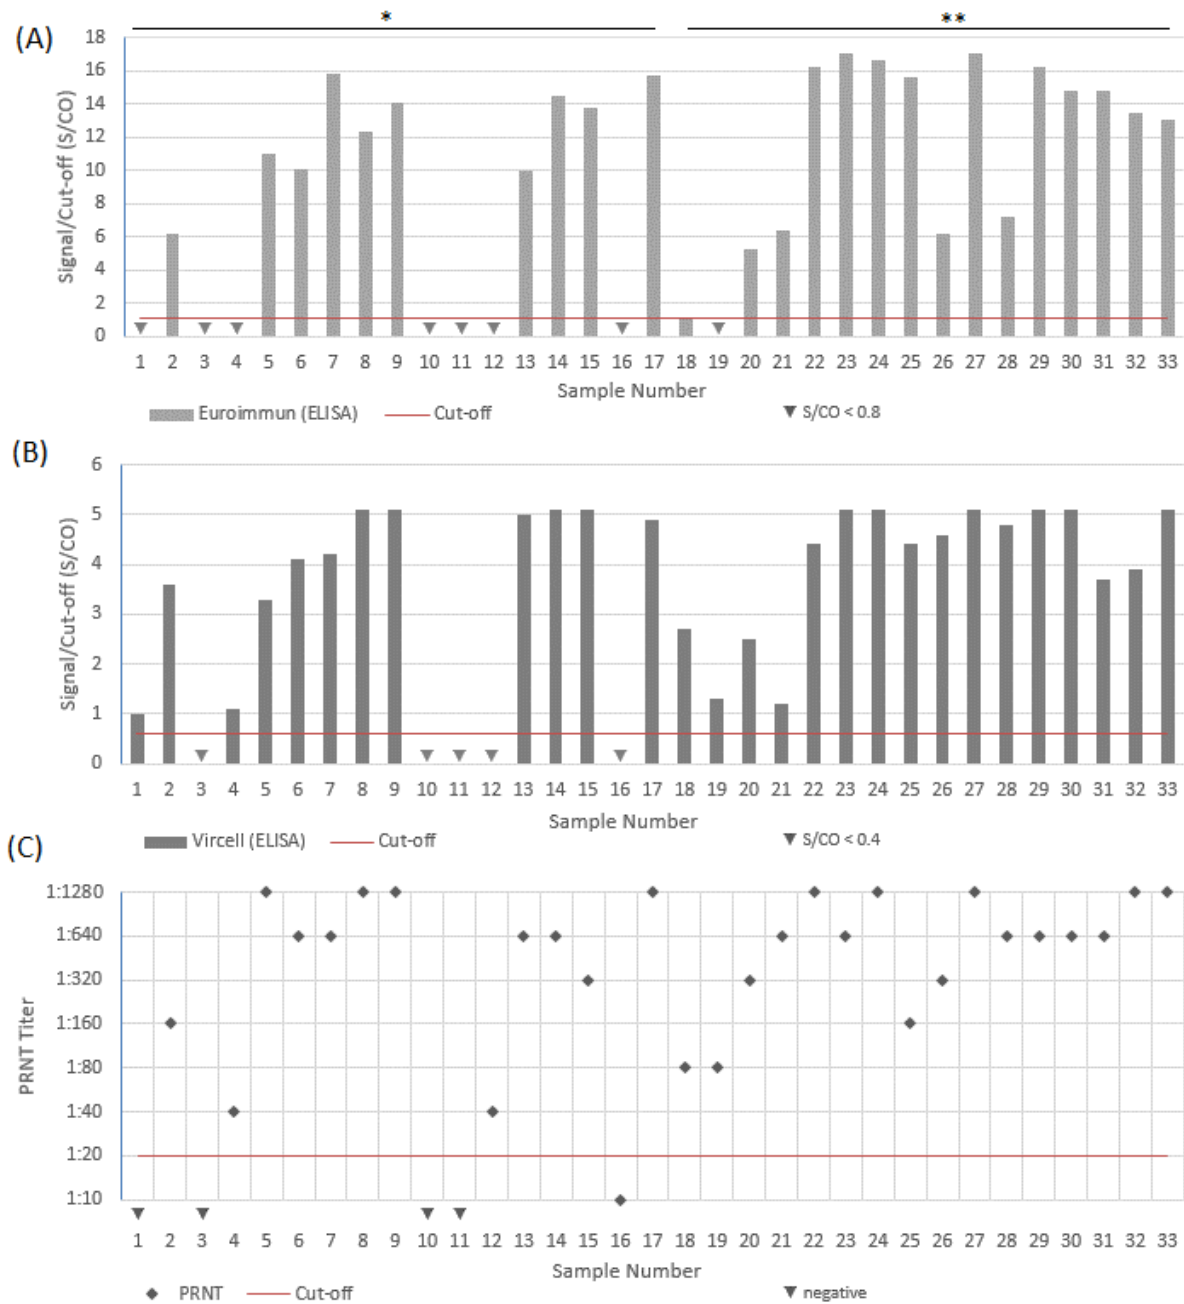

148  
 149 FIG 1 – Results of the for sensitivity tested samples in the ELISA assays and PRNT; (A) Euroimmun ELISA Signal/Cut-off  
 150 (S/CO) ratio of tested samples; (B) Vircell ELISA Signal/Cut-off (S/CO) ratio for tested samples; (C) PRNT Titer for tested  
 151 samples. \*Days 5-9 /\*\*Days 10-18 after confirmed SARS-CoV-2 PCR.

152

153 **Discussion**

154 In terms of sensitivity, our data are consistent with previously published data. In a study from Liu et  
155 al., using an rS-based ELISA assay, the group found SARS-CoV-2 IgG antibodies in less than 60% of the  
156 samples from days 6-10 after disease onset. The sensitivity increased to >90% in samples from days  
157 16-20 (4). In a study from Wölfel et al., using an in-house developed IFA, the group found  
158 seroconversion in all examined follow-up serum samples of COVID-19 patients by day 14 after onset  
159 of symptoms. The samples were further analyzed via PRNT, all showed neutralization activity against  
160 SARS-CoV-2 (5).

161 An important finding of our study is, that (with exception of sample 1) all detected SARS-CoV-2 IgG  
162 antibodies in the analyzed cohort, using the commercially available assays examined, demonstrated  
163 neutralizing (protective) properties in the PRNT. The screening for SARS-CoV-2 IgG antibodies  
164 [especially for potential protective IgG antibodies against the S protein (6)] using ELISA or lateral flow  
165 assays is more convenient and practicable than using the hands on- and time-intensive IFA or PRNT,  
166 which can only be performed by experienced personnel, and the PRNT, only in a BSL-3 laboratory.  
167 ELISA based assays can be automated and used for larger sample sizes. Lateral flow assays can be  
168 used by less experienced personnel in a point-of-care setting, generating results in short time. Some  
169 samples, however, were only detected with the IFA and PRNT as gold standard. The titer needed for  
170 potential protective immunity is not yet (officially) defined. In one study, it is reported, that a  
171 individual cleared SARS-CoV-2 without developing antibodies up to 46 days after illness (7). The  
172 mechanism of immunity, especially of protective immunity (if applicable) and how long it will last,  
173 need to be further investigated. Besides humoral mediated immunity, there is evidence that T-cell  
174 mediated immunity plays a role (8). Most of the SARS-CoV-2 samples analysed in this study were  
175 from individuals with moderate to severe clinical course, who required an in-patient hospital stay.  
176 We have also tested follow-up samples of individuals PCR-diagnosed with COVID-19 with mild or no  
177 symptoms at all, IgG antibodies could only be detected after 6 weeks (data not shown). In terms of  
178 specificity, cross-reacting antibodies of endemic coronavirus infected individuals or of individuals

179 with other active infectious diseases (e.g. EBV or CMV) are a known phenomenon (9). The examined  
180 assays in our study demonstrated a good specificity. Only the Vircell ELISA generated one positive  
181 result for one HCoV-229E sample, whereas the Euroimmun ELISA generated only one borderline  
182 result for the HCoV-OC43 sample and the IFA an unspecific signal in one EBV sample. For the Assure  
183 Tech Rapid Test, no cross-reactions were observed, however, a larger sample size would be needed  
184 to get a clearer picture. The cross-reactivity of the SARS-CoV samples from the outbreak of 2003 in  
185 the Vircell ELISA and IFA are of less importance as the virus is known to be eradicated. Nonetheless,  
186 as a false positive result might give a false sense of security, efforts should be made to further  
187 improve the specificity of the available assays. All in our study examined assays are eligible for the  
188 detection of SARS-CoV-2 IgG antibodies, indicating a potential protective immunity. Ideally, to get the  
189 maximum sensitivity, testing should be performed in the later phase of infection ( $\geq 10$  days) after  
190 PCR-confirmation or disease onset of COVID-19. The Vircell ELISA, IFA and PRNT demonstrated the  
191 highest sensitivity throughout our study. At the moment, however, the PRNT is still the method of  
192 choice for questions regarding potential SARS-CoV-2 immunity and should be performed when  
193 available.

194

195

## 196 References

- 197 1. Rabi FA, Al Zoubi MS, Kasasbeh GA, Salameh DM, Al-Nasser AD. 2020. SARS-CoV-2 and  
198 Coronavirus Disease 2019: What We Know So Far. *Pathogens* 9.  
199 doi:10.3390/pathogens9030231.
- 200 2. Rajendran K, Narayanasamy K, Rangarajan J, Rathinam J, Natarajan M, Ramachandran A. 2020.  
201 Convalescent plasma transfusion for the treatment of COVID-19: Systematic review. *J Med Virol*.  
202 doi:10.1002/jmv.25961.
- 203 3. Ou X, Liu Y, Lei X, Li P, Mi D, Ren L, Guo L, Guo R, Chen T, Hu J, Xiang Z, Mu Z, Chen X, Chen J, Hu  
204 K, Jin Q, Wang J, Qian Z. 2020. Characterization of spike glycoprotein of SARS-CoV-2 on virus  
205 entry and its immune cross-reactivity with SARS-CoV. *Nat Commun* 11:1620.  
206 doi:10.1038/s41467-020-15562-9.
- 207 4. Liu W, Liu L, Kou G, Zheng Y, Ding Y, Ni W, Wang Q, Tan L, Wu W, Tang S, Xiong Z, Zheng S. 2020.  
208 Evaluation of Nucleocapsid and Spike Protein-based ELISAs for detecting antibodies against  
209 SARS-CoV-2. *J Clin Microbiol*. doi:10.1128/JCM.00461-20.
- 210 5. Wölfel R, Corman VM, Guggemos W, Seilmaier M, Zange S, Müller MA, Niemeyer D, Jones TC,  
211 Vollmar P, Rothe C, Hoelscher M, Bleicker T, Brünink S, Schneider J, Ehmann R, Zwirgmaier K,  
212 Drosten C, Wendtner C. 2020. Virological assessment of hospitalized patients with COVID-2019.  
213 *Nature*. doi:10.1038/s41586-020-2196-x.
- 214 6. Zhou G, Zhao Q. 2020. Perspectives on therapeutic neutralizing antibodies against the Novel  
215 Coronavirus SARS-CoV-2. *Int J Biol Sci* 16:1718–1723. doi:10.7150/ijbs.45123.
- 216 7. Wang B, Wang L, Kong X, Geng J, Di Xiao, Ma C, Jiang X-M, Wang P-H. 2020. Long-term  
217 Coexistence of SARS-CoV-2 with Antibody Response in COVID-19 Patients. *J Med Virol*.  
218 doi:10.1002/jmv.25946.
- 219 8. Tay MZ, Poh CM, Rénia L, MacAry PA, Ng LFP. 2020. The trinity of COVID-19: immunity,  
220 inflammation and intervention. *Nat Rev Immunol*. doi:10.1038/s41577-020-0311-8.
- 221 9. Okba NMA, Müller MA, Li W, Wang C, GeurtsvanKessel CH, Corman VM, Lamers MM, Sikkema  
222 RS, Bruin E de, Chandler FD, Yazdanpanah Y, Le Hingrat Q, Descamps D, Houhou-Fidouh N,  
223 Reusken CBEM, Bosch B-J, Drosten C, Koopmans MPG, Haagmans BL. 2020. Severe Acute  
224 Respiratory Syndrome Coronavirus 2-Specific Antibody Responses in Coronavirus Disease 2019  
225 Patients. *Emerging Infect Dis* 26. doi:10.3201/eid2607.200841.

226  
227

228

229

230

231

232

233

234

235

236

237

238 **Supplementary Material**

239

240 TABLE S1 – For sensitivity tested individual follow-up samples of SARS-CoV-2 PCR-confirmed individuals at different time  
241 points and generated results.

| Sample Nr. | Day after confirmed SARS-CoV-2 PCR | Euroimmun (ELISA) S/CO | Vircell (ELISA) S/CO | IFA (in-house) qual. | Assure Tech (Rapid Test) qual. | PRNT Titer |
|------------|------------------------------------|------------------------|----------------------|----------------------|--------------------------------|------------|
| 1          | 5                                  | <0.8                   | 1.0                  | neg.                 | neg.                           | neg.       |
| 2          | 6                                  | 6.2                    | 3.6                  | pos.                 | pos.                           | 1:160      |
| 3          | 6                                  | <0.8                   | <0.4                 | neg.                 | neg.                           | neg.       |
| 4          | 6                                  | <0.8                   | 1.1                  | pos.                 | pos.                           | 1:40       |
| 5          | 6                                  | 11                     | 3.3                  | pos.                 | pos.                           | 1:1280     |
| 6          | 6                                  | 10.1                   | 4.1                  | pos.                 | pos.                           | 1:640      |
| 7          | 7                                  | 15.8                   | 4.2                  | pos.                 | pos.                           | 1:640      |
| 8          | 7                                  | 12.3                   | 5.1                  | pos.                 | pos.                           | 1:1280     |
| 9          | 7                                  | 14.1                   | 5.1                  | pos.                 | pos.                           | 1:1280     |
| 10         | 8                                  | <0.8                   | <0.4                 | neg.                 | neg.                           | neg.       |
| 11         | 8                                  | <0.8                   | <0.4                 | neg.                 | neg.                           | neg.       |
| 12         | 8                                  | <0.8                   | <0.4                 | pos.                 | neg.                           | neg.       |
| 13         | 8                                  | 10                     | 5                    | pos.                 | pos.                           | 1:640      |
| 14         | 8                                  | 14.5                   | 5.1                  | pos.                 | pos.                           | 1:640      |
| 15         | 8                                  | 13.8                   | 5.1                  | pos.                 | -                              | 1:320      |
| 16         | 9                                  | <0.8                   | <0.4                 | pos.                 | neg.                           | 1:10       |
| 17         | 9                                  | 15.7                   | 4.9                  | pos.                 | pos.                           | 1:1280     |
| 18         | 10                                 | 1.13                   | 2.7                  | pos.                 | pos.                           | 1:80       |
| 19         | 10                                 | neg                    | 1.3                  | pos.                 | neg.                           | 1:80       |
| 20         | 10                                 | 5.2                    | 2.5                  | pos.                 | pos.                           | 1:320      |
| 21         | 10                                 | 6.4                    | 1.2                  | pos.                 | pos.                           | 1:640      |
| 22         | 10                                 | 16.2                   | 4.4                  | pos.                 | pos.                           | 1:1280     |
| 23         | 11                                 | 17                     | 5.1                  | pos.                 | pos.                           | 1:640      |
| 24         | 13                                 | 16.6                   | 5.1                  | pos.                 | pos.                           | 1:1280     |
| 25         | 13                                 | 15.6                   | 4.4                  | pos.                 | pos.                           | 1:160      |
| 26         | 14                                 | 6.14                   | 4.6                  | pos.                 | pos.                           | 1:320      |
| 27         | 14                                 | 17                     | 5.1                  | pos.                 | pos.                           | 1:1280     |
| 28         | 16                                 | 7.2                    | 4.8                  | pos.                 | pos.                           | 1:640      |
| 29         | 16                                 | 16.2                   | 5.1                  | pos.                 | pos.                           | 1:640      |
| 30         | 16                                 | 14.8                   | 5.1                  | pos.                 | pos.                           | 1:640      |
| 31         | 17                                 | 14.8                   | 3.7                  | pos.                 | pos.                           | 1:640      |
| 32         | 17                                 | 13.4                   | 3.9                  | pos.                 | pos.                           | 1:1280     |
| 33         | 18                                 | 13                     | 5.1                  | pos.                 | pos.                           | 1:1280     |

242 Euroimmun (S/CO <0.8 = negative, 0.8-<1.1 = equivocal, ≥ 1.1 = positive), Vircell (S/CO <0.4 = neg., 0.4-0.6 = equivocal, >0.6  
243 = pos.); pos., positive; neg., negative; -, not tested.

244

245

246

247 TABLE S2 – For specificity tested follow-up samples of individuals with selected PCR- or serologically-confirmed infections  
248 and generated results.

| Sample Nr. | Recently PCR-/serologically-confirmed infected with | Euroimmun (ELISA) S/CO | Vircell (ELISA) S/CO | IFA (in-house) qual. | Assure Tech (Rapid Test) qual. |
|------------|-----------------------------------------------------|------------------------|----------------------|----------------------|--------------------------------|
| 1          | HCoV-OC43                                           | neg.                   | neg.                 | neg.                 | neg.                           |
| 2          | HCoV-OC43                                           | 0.9                    | neg.                 | neg.                 | neg.                           |
| 3          | HCoV-OC43                                           | neg.                   | neg.                 | neg.                 | neg.                           |
| 4          | HCoV-OC43                                           | neg.                   | neg.                 | neg.                 | neg.                           |
| 5          | HKU 1                                               | neg.                   | neg.                 | neg.                 | neg.                           |
| 6          | SARS-CoV-1                                          | neg.                   | 2.2                  | pos.                 | -                              |
| 7          | SARS-CoV-1                                          | neg.                   | 3.8                  | pos.                 | -                              |
| 8          | SARS-CoV-1                                          | neg.                   | 3.9                  | pos.                 | -                              |
| 9          | SARS-CoV-2 neg.                                     | neg.                   | neg.                 | neg.                 | -                              |
| 10         | SARS-CoV-2 neg.                                     | neg.                   | neg.                 | neg.                 | -                              |
| 11         | SARS-CoV-2 (neg.)                                   | neg.                   | neg.                 | -                    | -                              |
| 12         | SARS-CoV-2 + Multiplex* neg.                        | neg.                   | neg.                 | neg.                 | -                              |
| 13         | HCoV-229E                                           | neg.                   | neg.                 | neg.                 | -                              |
| 14         | HCoV-229E                                           | neg.                   | 1.5                  | neg.                 | -                              |
| 15         | HCoV 229E + Parainfluenza Virus Type 3              | neg.                   | neg.                 | neg.                 | neg.                           |
| 16         | HCoV-229E                                           | neg.                   | neg.                 | neg.                 | neg.                           |
| 17         | HCoV-229E                                           | neg.                   | neg.                 | neg.                 | neg.                           |
| 18         | HCoV-NL63 + Enterovirus/Rhinovirus                  | neg.                   | neg.                 | neg.                 | neg.                           |
| 19         | HCoV-NL63                                           | neg.                   | neg.                 | -                    | -                              |
| 20         | CMV (+ IgM antibody pos.)                           | neg.                   | neg.                 | neg.                 | neg.                           |
| 21         | CMV (+IgM antibody pos.)                            | neg.                   | neg.                 | neg.                 | neg.                           |
| 22         | CMV (+ IgM antibody pos.)                           | neg.                   | neg.                 | -                    | -                              |
| 23         | EBV-VCA-IgM pos.                                    | neg.                   | neg.                 | neg.                 | neg.                           |
| 24         | EBV (+ -VCA-IgM antibody pos.)                      | neg.                   | neg.                 | neg.                 | neg.                           |
| 25         | EBV-VCA-IgM antibody pos .                          | neg.                   | -                    | neg.                 | -                              |
| 26         | EBV-VCA-IgM antibody pos .                          | neg.                   | -                    | unsp.                | -                              |

249 Euroimmun (S/CO <0.8 = negative, 0.8-<1.1 = equivocal, ≥ 1.1 = positive); Vircell (S/CO <0.4 = neg., 0.4-0.6 = equivocal, >0.6  
250 = pos.); pos., positive; neg., negative; unsp., unspecific; \*Biofire® Filmarray® 20 Target Respiratory Panel (bioMérieux,  
251 Nürtingen, Baden-Württemberg, Germany); -, not tested.

252

253

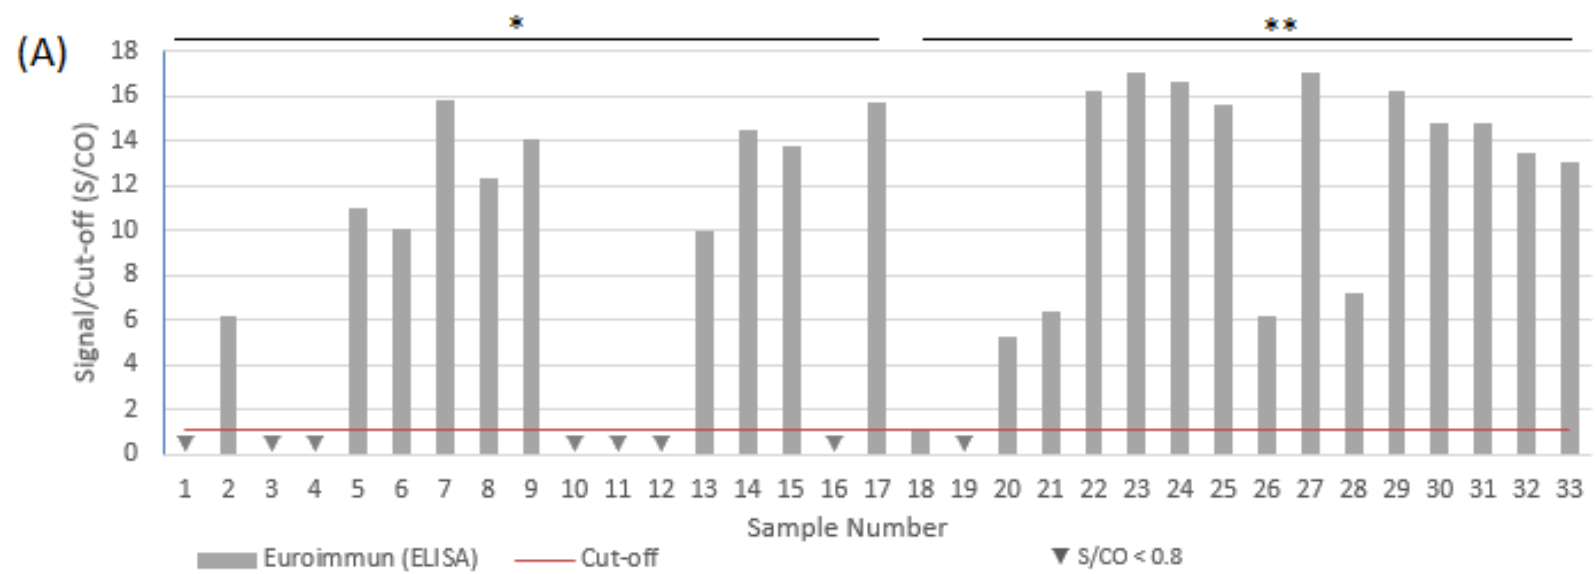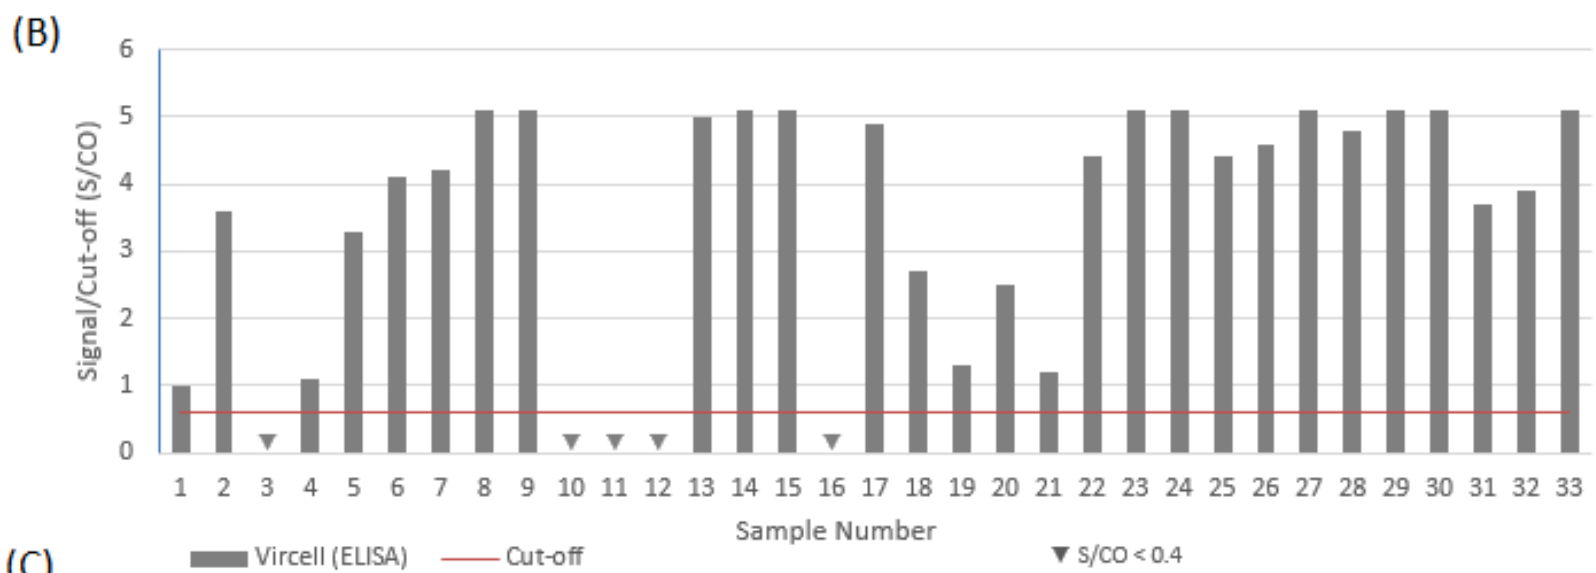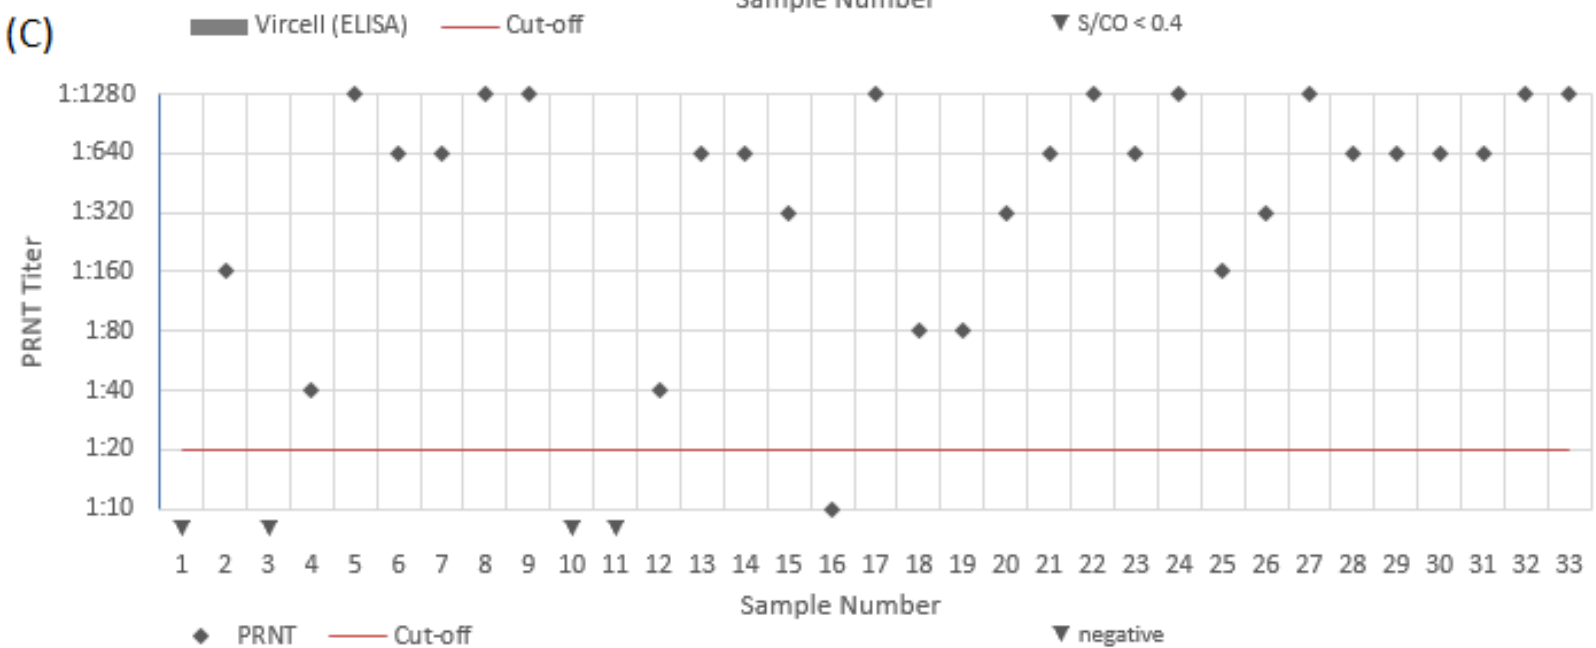

Source: https://www.biorxiv.org/content/10.1101/2020.05.08.085506v1.full.pdf
